# Supplementary material for: Microscopic polarization in bilayer graphene
Source: Springer Nature journal article supplement (doi:10.1038/nphys1988), 2011-04-24
Supplement: 41567_2011_BFnphys1988_MOESM18_ESM.pdf [file 41567_2011_BFnphys1988_MOESM18_ESM.pdf]

## Microscopic Polarization in Bilayer Graphene

Gregory M. Rutter, Suyong Jung, Nikolai N. Klimov, David B. Newell, Nikolai B. Zhitenev\*, and Joseph A. Stroscio\*

\* To whom correspondence should be addressed:

Email: [nikolai.zhitenev@nist.gov](mailto:nikolai.zhitenev@nist.gov) (N. B. Z.), [joseph.stroscio@nist.gov](mailto:joseph.stroscio@nist.gov) (J.A.S.)

### This pdf file includes:

I. Numerical Data Analysis of Landau Levels  
References  
Figure S1

## Supplementary Material

### I. Numerical Data Analysis of Landau Levels

The low energy band structure of graphene consists of four bands; two bands meet at the charge neutrality point, and two higher energy bands related to the  $A_2$ - $B_1$  dimer bonds are offset by the interlayer energy  $\gamma_1$ . We adopt a two-band model, which includes only the lowest energy bands, to quantitatively analyze the LLs spectra<sup>2,3</sup>. The analysis of LLs is limited to the low energy regime (less than 150 meV), which meets the requirement of the two-band model;  $E < \gamma_1 = 0.377$  eV. We have found that this simple two-band model gives results within 5 % of those from the full four-band model<sup>4</sup>. Thus, the introduced error for using the simpler model is less than our experimental uncertainties. The simple analytic expression for the LL energies is derived from the two-band model as given by Eq. 1 in the main text, which we use to fit the LLs spectra with the potential energy asymmetry,  $\Delta U$  and Fermi velocity,  $v_F$  as free parameters.

Figure S1a shows the individual  $dI/dV$  spectrum obtained for the P1 electron puddle at  $V_g = 33$  V. Up to nine Landau levels are observed over the displayed spectra range in Fig. S1a. A fit of the LL energies with Eq. 1 yields an energy asymmetry,  $\Delta U = (-34.8 \pm 2.4)$  meV<sup>5</sup>, and Fermi velocity of  $v_F = (1.00 \pm 0.01) \times 10^6$  m s<sup>-1</sup> as shown in Fig. 3d in the main text.

The band gaps qualitatively follow the separation between  $LL_{(0,+)(1,+)}$  and  $LL_{(2,+)(2,-)}$ . We plot in Fig. S1b the difference in LL energies between  $LL_{(2,+)(2,-)}$  -  $LL_{(0,+)(1,+)}$ , which can be obtained directly from the gate maps (Fig. 3c). It is clear that the determined energy asymmetries from the fitting of the LLs with Eq. 1 (Fig. S1c, d) match the overall trend seen in the difference between LLs. Additionally, we have confirmed that using the Fermi velocity as a variable fit parameter only weakly affects the gap determination as demonstrated in Fig. S1c, d. Using the velocity as a fitting parameter, however, we observe a few percent variation in Fermi velocity as displayed in Fig. S1e, which can be ascribed to the velocity renormalization effects due to electron-electron interactions<sup>6</sup>.

### References:

1. McCann, E. & Fal'ko, V.I. Landau-Level

- Degeneracy and Quantum Hall Effect in a Graphite Bilayer. *Phys. Rev. Lett.* **96**, 086805 (2006).
2. Shizuya, K. Pseudo-zero-mode Landau levels and collective excitations in bilayer graphene. *Phys. Rev. B* **79**, 165402 (2009).
3. McCann, E. Asymmetry gap in the electronic band structure of bilayer graphene. *Phys. Rev. B* **74**, 161403 (2006).
4. Pereira, J.M., Peeters, F.M. & Vasilopoulos, P. Landau levels and oscillator strength in a biased bilayer of graphene. *Phys. Rev. B* **76**, 115419 (2007).
5. All uncertainties reported represent one standard deviation in the measured quantity.
6. Roldán, R., López-Sancho, M.P. & Guinea, F. Effect of electron-electron interaction on the Fermi surface topology of doped graphene. *Phys. Rev. B* **77**, 115410 (2008).

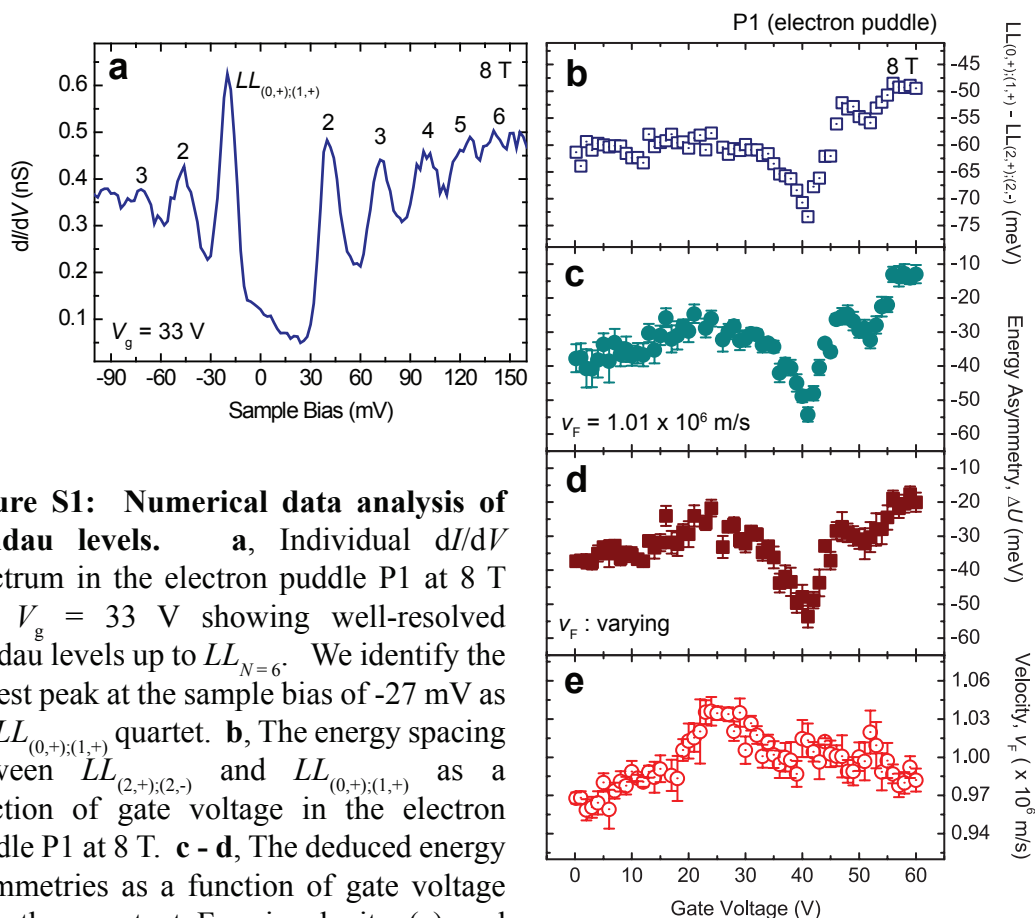

**Figure S1: Numerical data analysis of Landau levels.** **a**, Individual  $dI/dV$  spectrum in the electron puddle P1 at 8 T and  $V_g = 33$  V showing well-resolved Landau levels up to  $LL_{N=6}$ . We identify the largest peak at the sample bias of -27 mV as the  $LL_{(0,+);(1,+)}$  quartet. **b**, The energy spacing between  $LL_{(2,+);(2,-)}$  and  $LL_{(0,+);(1,+)}$  as a function of gate voltage in the electron puddle P1 at 8 T. **c - d**, The deduced energy asymmetries as a function of gate voltage with the constant Fermi velocity (**c**) and with the Fermi velocity as a fitting parameter (**d**). The band gaps follow the evolution of LL spacing displayed in **b**. **e**, The extracted Fermi velocity variation as a function of gate voltage from the LL fitting. The velocity renormalization, manifested by a few percent variations in magnitude does not affect the main features of bilayer energy asymmetry (Fig. S1c, d). Error bars one standard deviation, in (c) - (e).
